# Supplementary material for: GAS5 long non-coding RNA in malignant pleural mesothelioma
Source: PubMed Central journal article supplement (PMC4039656; doi:10.1186/1476-4598-13-119), 2014-05-23
Supplement: 1476-4598-13-119-S2.pdf [file 1476-4598-13-119-S2.pdf]

## Supplementary Table 1 – Different splice variants of GAS5 gene from Vega genome

browser

[http://vega.sanger.ac.uk/Homo\\_sapiens/Gene/Summary?g=OTTHUMG00000037216;r=1:173833038-173838020;db=vega\\_update](http://vega.sanger.ac.uk/Homo_sapiens/Gene/Summary?g=OTTHUMG00000037216;r=1:173833038-173838020;db=vega_update)

### Gene: GAS5 OTTHUMG00000037216

**Description** growth arrest-specific 5 (non-protein [coding](#))

**Location** [Chromosome 1: 173,833,038-173,838,020](#) reverse strand.

**Transcripts** This gene has 29 transcripts (splice variants) [Hide transcript table](#)

| <a href="#">Name</a> | <a href="#">Transcript ID</a>      | <a href="#">Length (bp)</a> | <a href="#">Protein ID</a> | <a href="#">Length (aa)</a> | <a href="#">Biotype</a> | <a href="#">CCDS</a> |
|----------------------|------------------------------------|-----------------------------|----------------------------|-----------------------------|-------------------------|----------------------|
| GAS5-016             | <a href="#">OTTHUMT00000090592</a> | 841                         | No protein product         | -                           | LincRNA                 | -                    |
| GAS5-015             | <a href="#">OTTHUMT00000090591</a> | 796                         | No protein product         | -                           | LincRNA                 | -                    |
| GAS5-027             | <a href="#">OTTHUMT00000090603</a> | 723                         | No protein product         | -                           | LincRNA                 | -                    |
| GAS5-014             | <a href="#">OTTHUMT00000090590</a> | 688                         | No protein product         | -                           | LincRNA                 | -                    |
| GAS5-001             | <a href="#">OTTHUMT00000090577</a> | 632                         | No protein product         | -                           | LincRNA                 | -                    |
| GAS5-003             | <a href="#">OTTHUMT00000090579</a> | 565                         | No protein product         | -                           | LincRNA                 | -                    |
| GAS5-008             | <a href="#">OTTHUMT00000090584</a> | 542                         | No protein product         | -                           | LincRNA                 | -                    |
| GAS5-013             | <a href="#">OTTHUMT00000090589</a> | 483                         | No protein product         | -                           | LincRNA                 | -                    |
| GAS5-028             | <a href="#">OTTHUMT00000090604</a> | 413                         | No protein product         | -                           | LincRNA                 | -                    |
| GAS5-020             | <a href="#">OTTHUMT00000090596</a> | 242                         | No protein product         | -                           | LincRNA                 | -                    |
| GAS5-002             | <a href="#">OTTHUMT00000090578</a> | 1698                        | No protein product         | -                           | Retained intron         | -                    |
| GAS5-018             | <a href="#">OTTHUMT00000090594</a> | 1114                        | No protein product         | -                           | Retained intron         | -                    |
| GAS5-006             | <a href="#">OTTHUMT00000090582</a> | 1060                        | No protein product         | -                           | Retained intron         | -                    |
| GAS5-022             | <a href="#">OTTHUMT00000090598</a> | 979                         | No protein product         | -                           | Retained intron         | -                    |
| GAS5-011             | <a href="#">OTTHUMT00000090587</a> | 897                         | No protein product         | -                           | Retained intron         | -                    |
| GAS5-004             | <a href="#">OTTHUMT00000090580</a> | 822                         | No protein product         | -                           | Retained intron         | -                    |
| GAS5-012             | <a href="#">OTTHUMT00000090588</a> | 799                         | No protein product         | -                           | Retained intron         | -                    |
| GAS5-017             | <a href="#">OTTHUMT00000090593</a> | 772                         | No protein product         | -                           | Retained intron         | -                    |
| GAS5-019             | <a href="#">OTTHUMT00000090595</a> | 745                         | No protein product         | -                           | Retained intron         | -                    |
| GAS5-029             | <a href="#">OTTHUMT00000090605</a> | 723                         | No protein product         | -                           | Retained intron         | -                    |
| GAS5-010             | <a href="#">OTTHUMT00000090586</a> | 712                         | No protein product         | -                           | Retained intron         | -                    |
| GAS5-023             | <a href="#">OTTHUMT00000090599</a> | 643                         | No protein product         | -                           | Retained intron         | -                    |
| GAS5-009             | <a href="#">OTTHUMT00000090585</a> | 632                         | No protein product         | -                           | Retained intron         | -                    |
| GAS5-026             | <a href="#">OTTHUMT00000090602</a> | 621                         | No protein product         | -                           | Retained intron         | -                    |
| GAS5-007             | <a href="#">OTTHUMT00000090583</a> | 583                         | No protein product         | -                           | Retained intron         | -                    |
| GAS5-024             | <a href="#">OTTHUMT00000090600</a> | 575                         | No protein product         | -                           | Retained intron         | -                    |
| GAS5-021             | <a href="#">OTTHUMT00000090597</a> | 497                         | No protein product         | -                           | Retained intron         | -                    |
| GAS5-005             | <a href="#">OTTHUMT00000090581</a> | 469                         | No protein product         | -                           | Retained intron         | -                    |
| GAS5-025             | <a href="#">OTTHUMT00000090601</a> | 424                         | No protein product         | -                           | Retained intron         | -                    |

## Summary

**Synonyms** NCRNA00030, SNHG2 [To [view](#) all genes linked to the name [click here](#).]

**Gene type** Known Processed transcript [[Definition](#)]

**Author** This gene was annotated by Havana <[vega@sanger.ac.uk](mailto:vega@sanger.ac.uk)>

**Version & date** Version 3, last modified on 23/10/2013 (Created on 04/05/2004)

**Remarks** ncRNA host
