# Supplementary material for: GAS5 long non-coding RNA in malignant pleural mesothelioma
Source: PubMed Central journal article supplement (PMC4039656; doi:10.1186/1476-4598-13-119), 2014-05-23
Supplement: 1476-4598-13-119-S3.pdf [file 1476-4598-13-119-S3.pdf]

**Supplementary Table 2 - List of GAS5 alternative splice variants detectable by RT-PCR primer sets.** Sequence of primers was matched with human cDNA database by using BLASTN search tool with exact match sensitivity (Vega Genome Browser 54). Transcripts ID that were common to both primers sets are in bold.

| <b>Vega Genome Browser 54 Transcript ID</b> |                           |
|---------------------------------------------|---------------------------|
| <b>GAS5-Ex-4-8</b>                          | <b>GAS5-Ex-6-12</b>       |
| <b>OTTHUMT00000090577</b>                   | <b>OTTHUMT00000090577</b> |
| <b>OTTHUMT00000090578</b>                   | <b>OTTHUMT00000090578</b> |
| <b>OTTHUMT00000090579</b>                   | <b>OTTHUMT00000090579</b> |
| <b>OTTHUMT00000090580</b>                   | <b>OTTHUMT00000090580</b> |
| OTTHUMT00000090583                          | OTTHUMT00000090584        |
| OTTHUMT00000090585                          | <b>OTTHUMT00000090586</b> |
| <b>OTTHUMT00000090586</b>                   | <b>OTTHUMT00000090590</b> |
| OTTHUMT00000090588                          | <b>OTTHUMT00000090593</b> |
| OTTHUMT00000090589                          | OTTHUMT00000090595        |
| <b>OTTHUMT00000090590</b>                   | OTTHUMT00000090598        |
| <b>OTTHUMT00000090593</b>                   | OTTHUMT00000090603        |
| OTTHUMT00000090594                          | OTTHUMT00000090604        |
| OTTHUMT00000090595                          | OTTHUMT00000090605        |
| OTTHUMT00000090597                          |                           |
