# Supplementary material for: GAS5 long non-coding RNA in malignant pleural mesothelioma
Source: PubMed Central journal article supplement (PMC4039656; doi:10.1186/1476-4598-13-119), 2014-05-23
Supplement: 1476-4598-13-119-S5.pdf [file 1476-4598-13-119-S5.pdf]

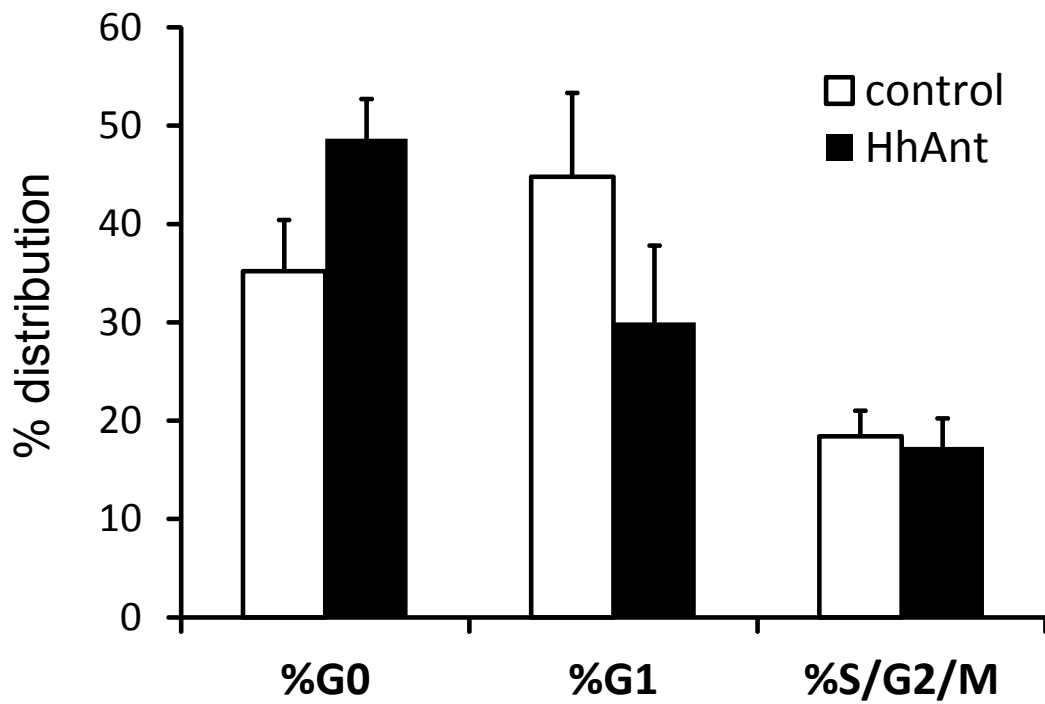

Figure S3
